# Supplementary material for: Association of Septic Shock with Mortality in Hospitalized COVID-19 Patients in Wuhan, China
Source: Hindawi journal article supplement (doi:10.1155/2022/3178283), 2022-04-23
Supplement: f1 [file 3178283.f1.pdf]

## Supplementary Appendix

Association of Septic Shock with Mortality in Hospitalized COVID-19 Patients in Wuhan, China

### Medications

Dexzopicleone was administrated depending on the suggested dose, 1 mg/per day at slumber time. Antibiotics (moxifloxacin), corticosteroid/glucocorticoid according to their clinical presentation Antiviral medicine, ganciclovir, oseltamivir, Arbidol®, Kaletra® (lopinavir/ritonavir, 200 mg/500mg bid), interferon- $\alpha$  (aerosol inhalation, 2 mL bid). Dose and correct method were as counseled in the guidelines of COVID-19 diagnosis and treatment trial (5th edition), by the National Health Commission of the People's Republic of China.

Supplementary Figure S1

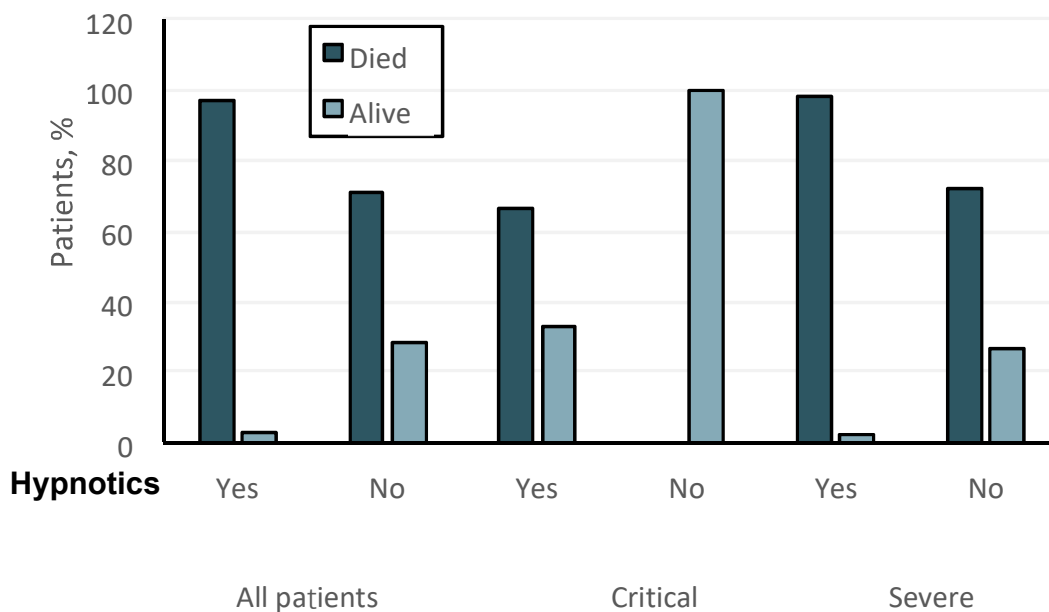

### Supplementary Figure S1 Clinical outcomes with hypnotics

The survival rates of patients who took hypnotics shown in critical and severe severity were 66.7% and 98.2%. Of 100% ,27.3% of Non-hypnotics patients died in the critical and severe group.

### Supplementary Figure S2

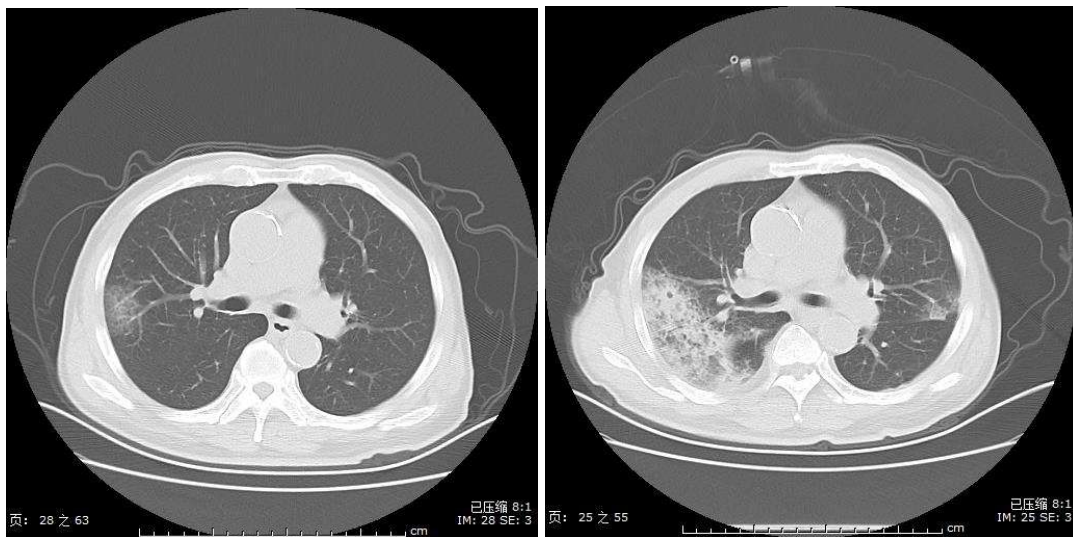

Figure S2. Illustrative chest computer tomography (CT) scans from one COVID-19 patients with septic shock. The picture on the left was collected when the patient was first admitted to the hospital, and on the right is five days later. The figure clearly shows that 1. Under the right lung pleura, see a patchy membrane glass shadow. 2. The lesions of both lungs increased more than before, and the lesions of the right lung progressed more than before.

Supplementary Table S1. Radiographic and laboratory findings of patients with COVID-19

| Supplementary Table S1. Radiographic and laboratory findings of patients with COVID-19 |               |                  |                  |         |
|----------------------------------------------------------------------------------------|---------------|------------------|------------------|---------|
| Radiologic and laboratory findings                                                     | All Patients  | Clinical outcome |                  | p Value |
|                                                                                        |               | Septic Shock     | Non-Septic Shock |         |
|                                                                                        | 212           | 30               | 182              |         |
| Radiologic findings                                                                    |               |                  |                  |         |
| Abnormalities on chest CT – No./total No. (%)                                          |               |                  |                  |         |
| No GGO                                                                                 | 2/212(0.9)    | 0/30(0)          | 2/182(1.1)       | 1.000   |
| Local GGO                                                                              | 8/212(3.8)    | 1/30(3.3)        | 7/182(3.8)       | 1.000   |
| Bilateral GGO                                                                          | 111/212(52.4) | 11/30(36.7)      | 100/182(54.9)    | 0.063   |
| Combination of patchy ground-glass opacity and pulmonary consolidation                 | 39/212(18.4)  | 1/30(3.3)        | 38/182(20.9)     | 0.019   |
| Crazy paving sign                                                                      | 19/212(9)     | 6/30(20)         | 13/182(7.1)      | 0.022   |
| Diffuse patchy ground glass and air bronchogram                                        | 20/212(9.4)   | 3/30(10)         | 17/182(9.3)      | 1.000   |
| Bilateral pulmonary multiple consideration and intralobular interstitial thickening    | 7/212(3.3)    | 6/30(20)         | 1/182(0.5)       | <0.001  |
| Laboratory findings                                                                    |               |                  |                  |         |
| PH*                                                                                    |               |                  |                  | 0.377   |
| <7.35                                                                                  | 1/212(0.5)    | 1/11(9.1)        | 0/26(0)          | 0.308   |
| 7.35-7.45                                                                              | 11/212(5.2)   | 3/11(27.3)       | 8/26(30.8)       | 1.000   |
| >7.45                                                                                  | 25/212(11.8)  | 7/11(63.6)       | 18/26(69.2)      | 1.000   |
| PaO2, mmHg *                                                                           |               |                  |                  | 0.505   |
| <80                                                                                    | 21/212(9.9)   | 6/11(54.5)       | 15/26(57.7)      | 1.000   |
| 80-100                                                                                 | 6/212(2.8)    | 3/11(27.3)       | 3/26(11.5)       | 0.322   |
| >100                                                                                   | 10/212(4.7)   | 2/11(18.2)       | 8/26(30.8)       | 0.667   |
| PaCO2, mmHg *                                                                          |               |                  |                  | 0.080   |
| <35                                                                                    | 22/212(10.4)  | 4/11(36.4)       | 18/26(69.2)      | 0.077   |
| 35-45                                                                                  | 15/212(7.1)   | 7/11(63.6)       | 8/26(30.8)       | 0.094   |
| PaO2/Fio2*                                                                             |               |                  |                  | 0.079   |
| <400                                                                                   | 31/212(14.6)  | 9/11(81.8)       | 22/25(88)        | 1.000   |

|                                                              |               |             |               |        |
|--------------------------------------------------------------|---------------|-------------|---------------|--------|
| 400-500                                                      | 2/212(0.9)    | 2/11(18.2)  | 0/25(0)       | 0.089  |
| >500                                                         | 3/212(1.4)    | 0/11(0)     | 3/25(12)      | 0.545  |
| <b>White blood cell count, ×10<sup>9</sup>/L</b>             |               |             |               | 0.000  |
| <4                                                           | 54/212(25.5)  | 5/29(17.2)  | 49/176(27.8)  | 0.263  |
| 4-10                                                         | 133/212(62.7) | 14/29(48.3) | 119/176(67.6) | 0.043  |
| >10                                                          | 18/212(8.5)   | 10/29(34.5) | 8/176(4.5)    | <0.001 |
| <b>Neutrophil count, ×10<sup>9</sup>/L</b>                   |               |             |               | 0.005  |
| <40                                                          | 52/212(24.5)  | 5/29(17.2)  | 47/176(26.7)  | 0.369  |
| 40-75                                                        | 77/212(36.3)  | 5/29(17.2)  | 72/176(40.9)  | 0.013  |
| >75                                                          | 76/212(35.8)  | 19/29(65.5) | 57/176(32.4)  | 0.001  |
| <b>Lymphocyte count, ×10<sup>9</sup>/L</b>                   |               |             |               | 0.066  |
| <20                                                          | 133/212(62.7) | 25/29(86.2) | 108/176(61.4) | 0.008  |
| 20-50                                                        | 71/212(33.5)  | 4/29(13.8)  | 67/176(38.1)  | 0.007  |
| >50                                                          | 1/212(0.5)    | 0/29(0)     | 1/176(0.6)    | 1.000  |
| <b>Monocyte count, ×10<sup>9</sup>/L</b>                     |               |             |               | 0.635  |
| <3                                                           | 78/212(36.8)  | 12/29(41.4) | 66/175(37.7)  | 0.707  |
| 3-10                                                         | 101/212(47.6) | 15/29(51.7) | 86/175(49.1)  | 0.797  |
| >10                                                          | 25/212(11.8)  | 2/29(6.9)   | 23/175(13.1)  | 0.411  |
| <b>Platelet count, ×10<sup>9</sup>/L</b>                     |               |             |               | 0.009  |
| <100                                                         | 12/212(5.7)   | 5/29(17.2)  | 7/175(4)      | 0.018  |
| 100-300                                                      | 152/212(71.7) | 22/29(75.9) | 130/175(74.3) | 0.857  |
| >300                                                         | 40/212(18.9)  | 2/29(6.9)   | 38/175(21.7)  | 0.063  |
| <b>C-reactive protein level mg/liter – No./total No. (%)</b> |               |             |               | 0.130  |
| ≤3                                                           | 15/212(7.1)   | 0/30(0)     | 15/173(8.7)   | 0.143  |
| >3                                                           | 188/212(88.7) | 30/30(100)  | 158/173(91.3) | 0.133  |
| <b>SAA mg/liter – No./total No. (%)</b>                      |               |             |               | 0.078  |
| ≤10                                                          | 19/212(9)     | 0/27(0)     | 19/169(11.2)  | 0.079  |

|                                                   |                  |                 |                 |        |
|---------------------------------------------------|------------------|-----------------|-----------------|--------|
| >10                                               | 177/212(83.5)    | 27/27(100)      | 150/169(88.8)   | 0.077  |
| <b>Prothrombin time, s</b>                        |                  |                 |                 | 0.411  |
| <9                                                | 15/212(7.1)      | 1/30(3.3)       | 14/161(8.7)     | 0.484  |
| >14                                               | 30/212(14.2)     | 6/30(20)        | 24/161(14.9)    | 0.482  |
| <b>Activated partial thromboplastin time, s</b>   | 28.8(23-39.25)   | 34.5(27.1-41.8) | 27.7(20.3-38.8) | <0.001 |
| <b>Creatine kinase–CMB, U/L</b>                   | 23.9(21.65-25.1) | 23.6(21.2-24.7) | 41.4(24.2-45.6) | <0.001 |
| <b>Lactate, mmol/L</b>                            | 1.2(1.2-1.3)     | 1.2(1.2-1.3)    | 2.1(1.8-2.1)    | <0.001 |
| <b>D-dimer ≥ 0.5 mg/liter – No./total No. (%)</b> |                  |                 |                 | 0.907  |
| ≤0.5                                              | 92/212(43.4)     | 13/27(48.1)     | 79/162(48.8)    | 0.953  |
| >0.5                                              | 96/212(45.3)     | 13/27(48.1)     | 83/162(51.2)    | 0.766  |
| <b>Hypersensitive troponin I, pg/mL</b>           |                  |                 |                 | 0.906  |
| ≤0.04                                             | 111/212(52.4)    | 18/28(64.3)     | 93/142(65.5)    | 0.902  |
| >0.04                                             | 58/212(27.4)     | 9/28(32.1)      | 49/142(34.5)    | 0.809  |
| <b>Lactate dehydrogenase, U/L †</b>               |                  |                 |                 | 0.136  |
| <120                                              | 37/212(17.5)     | 1/4(25)         | 36/52(69.2)     | 0.113  |
| 120 - 250                                         | 6/212(2.8)       | 1/4(25)         | 5/52(9.6)       | 0.372  |
| >250                                              | 13/212(6.1)      | 2/4(50)         | 11/52(21.2)     | 0.237  |
| <b>Alanine aminotransferase, U/L</b>              |                  |                 |                 | 0.023  |
| <7                                                | 36/212(17)       | 0/29(0)         | 36/177(20.3)    | 0.006  |
| 7-40                                              | 125/212(59)      | 20/29(69)       | 105/177(59.3)   | 0.324  |
| >40                                               | 45/212(21.2)     | 9/29(31)        | 36/177(20.3)    | 0.196  |
| <b>Aspartate aminotransferase, U/L</b>            |                  |                 |                 | 0.008  |
| <13                                               | 40/212(18.9)     | 1/29(3.4)       | 39/178(21.9)    | 0.024  |
| 13-35                                             | 101/212(47.6)    | 12/29(41.4)     | 89/178(50)      | 0.389  |
| >35                                               | 66/212(31.1)     | 16/29(55.2)     | 50/178(28.1)    | 0.004  |
| <b>Total bilirubin, mmol/L</b>                    |                  |                 |                 | 0.773  |
| <5                                                | 13/212(6.1)      | 1/29(3.4)       | 12/178(6.7)     | 0.689  |

|                                          |               |             |               |        |
|------------------------------------------|---------------|-------------|---------------|--------|
| 5-22                                     | 158/212(74.5) | 22/29(75.9) | 136/178(76.4) | 0.949  |
| >22                                      | 36/212(17)    | 6/29(20.7)  | 30/178(16.9)  | 0.613  |
| <b>Blood urea nitrogen, mmol/L</b>       |               |             |               | 0.040  |
| <3                                       | 28/212(13.2)  | 2/29(6.9)   | 26/176(14.8)  | 0.397  |
| 3-8                                      | 117/212(55.2) | 13/29(44.8) | 104/176(59.1) | 0.150  |
| >8                                       | 60/212(28.3)  | 14/29(48.3) | 46/176(26.1)  | 0.015  |
| <b>Creatinine, <math>\mu</math>mol/L</b> |               |             |               | 0.030  |
| <88                                      | 170/212(80.2) | 19/29(65.5) | 151/177(85.3) | 0.009  |
| 88-144                                   | 31/212(14.6)  | 8/29(27.6)  | 23/177(13)    | 0.042  |
| >144                                     | 5/212(2.4)    | 2/29(6.9)   | 3/177(1.7)    | 0.144  |
| <b>Procalcitonin, ng/mL</b>              |               |             |               | 0.645  |
| $\leq 0.1$                               | 125/212(59)   | 17/25(68)   | 108/149(72.5) | 0.645  |
| >0.1                                     | 49/212(23.1)  | 8/25(32)    | 41/149(27.5)  | 0.645  |
| <b>Glucose, mmol/L</b>                   |               |             |               | <0.001 |
| <3.9                                     | 35/212(16.5)  | 0/26(0)     | 35/176(19.9)  | 0.006  |
| 3.9-6.1                                  | 84/212(39.6)  | 5/26(19.2)  | 79/176(44.9)  | 0.020  |
| >6.1                                     | 83/212(39.2)  | 21/26(80.8) | 62/176(35.2)  | <0.001 |
| <b>Potassium, mmol/L</b>                 |               |             |               | 0.026  |
| <3.5                                     | 54/212(25.5)  | 4/25(16)    | 50/171(29.2)  | 0.239  |
| 3.5-5.5                                  | 141/212(66.5) | 20/25(80)   | 121/171(70.8) | 0.368  |
| >5.5                                     | 1/212(0.5)    | 1/25(4)     | 0/171(0)      | 0.126  |

\*Data were missing for PH in 175(82.5%), for PaO<sub>2</sub> in 175(82.5%), for PaCO<sub>2</sub> in 175(82.5%), for PaO<sub>2</sub>:FiO<sub>2</sub> in 176(83%)

†Data were missing for lactate dehydrogenase in 152(71.6%)

Supplementary Figure S3

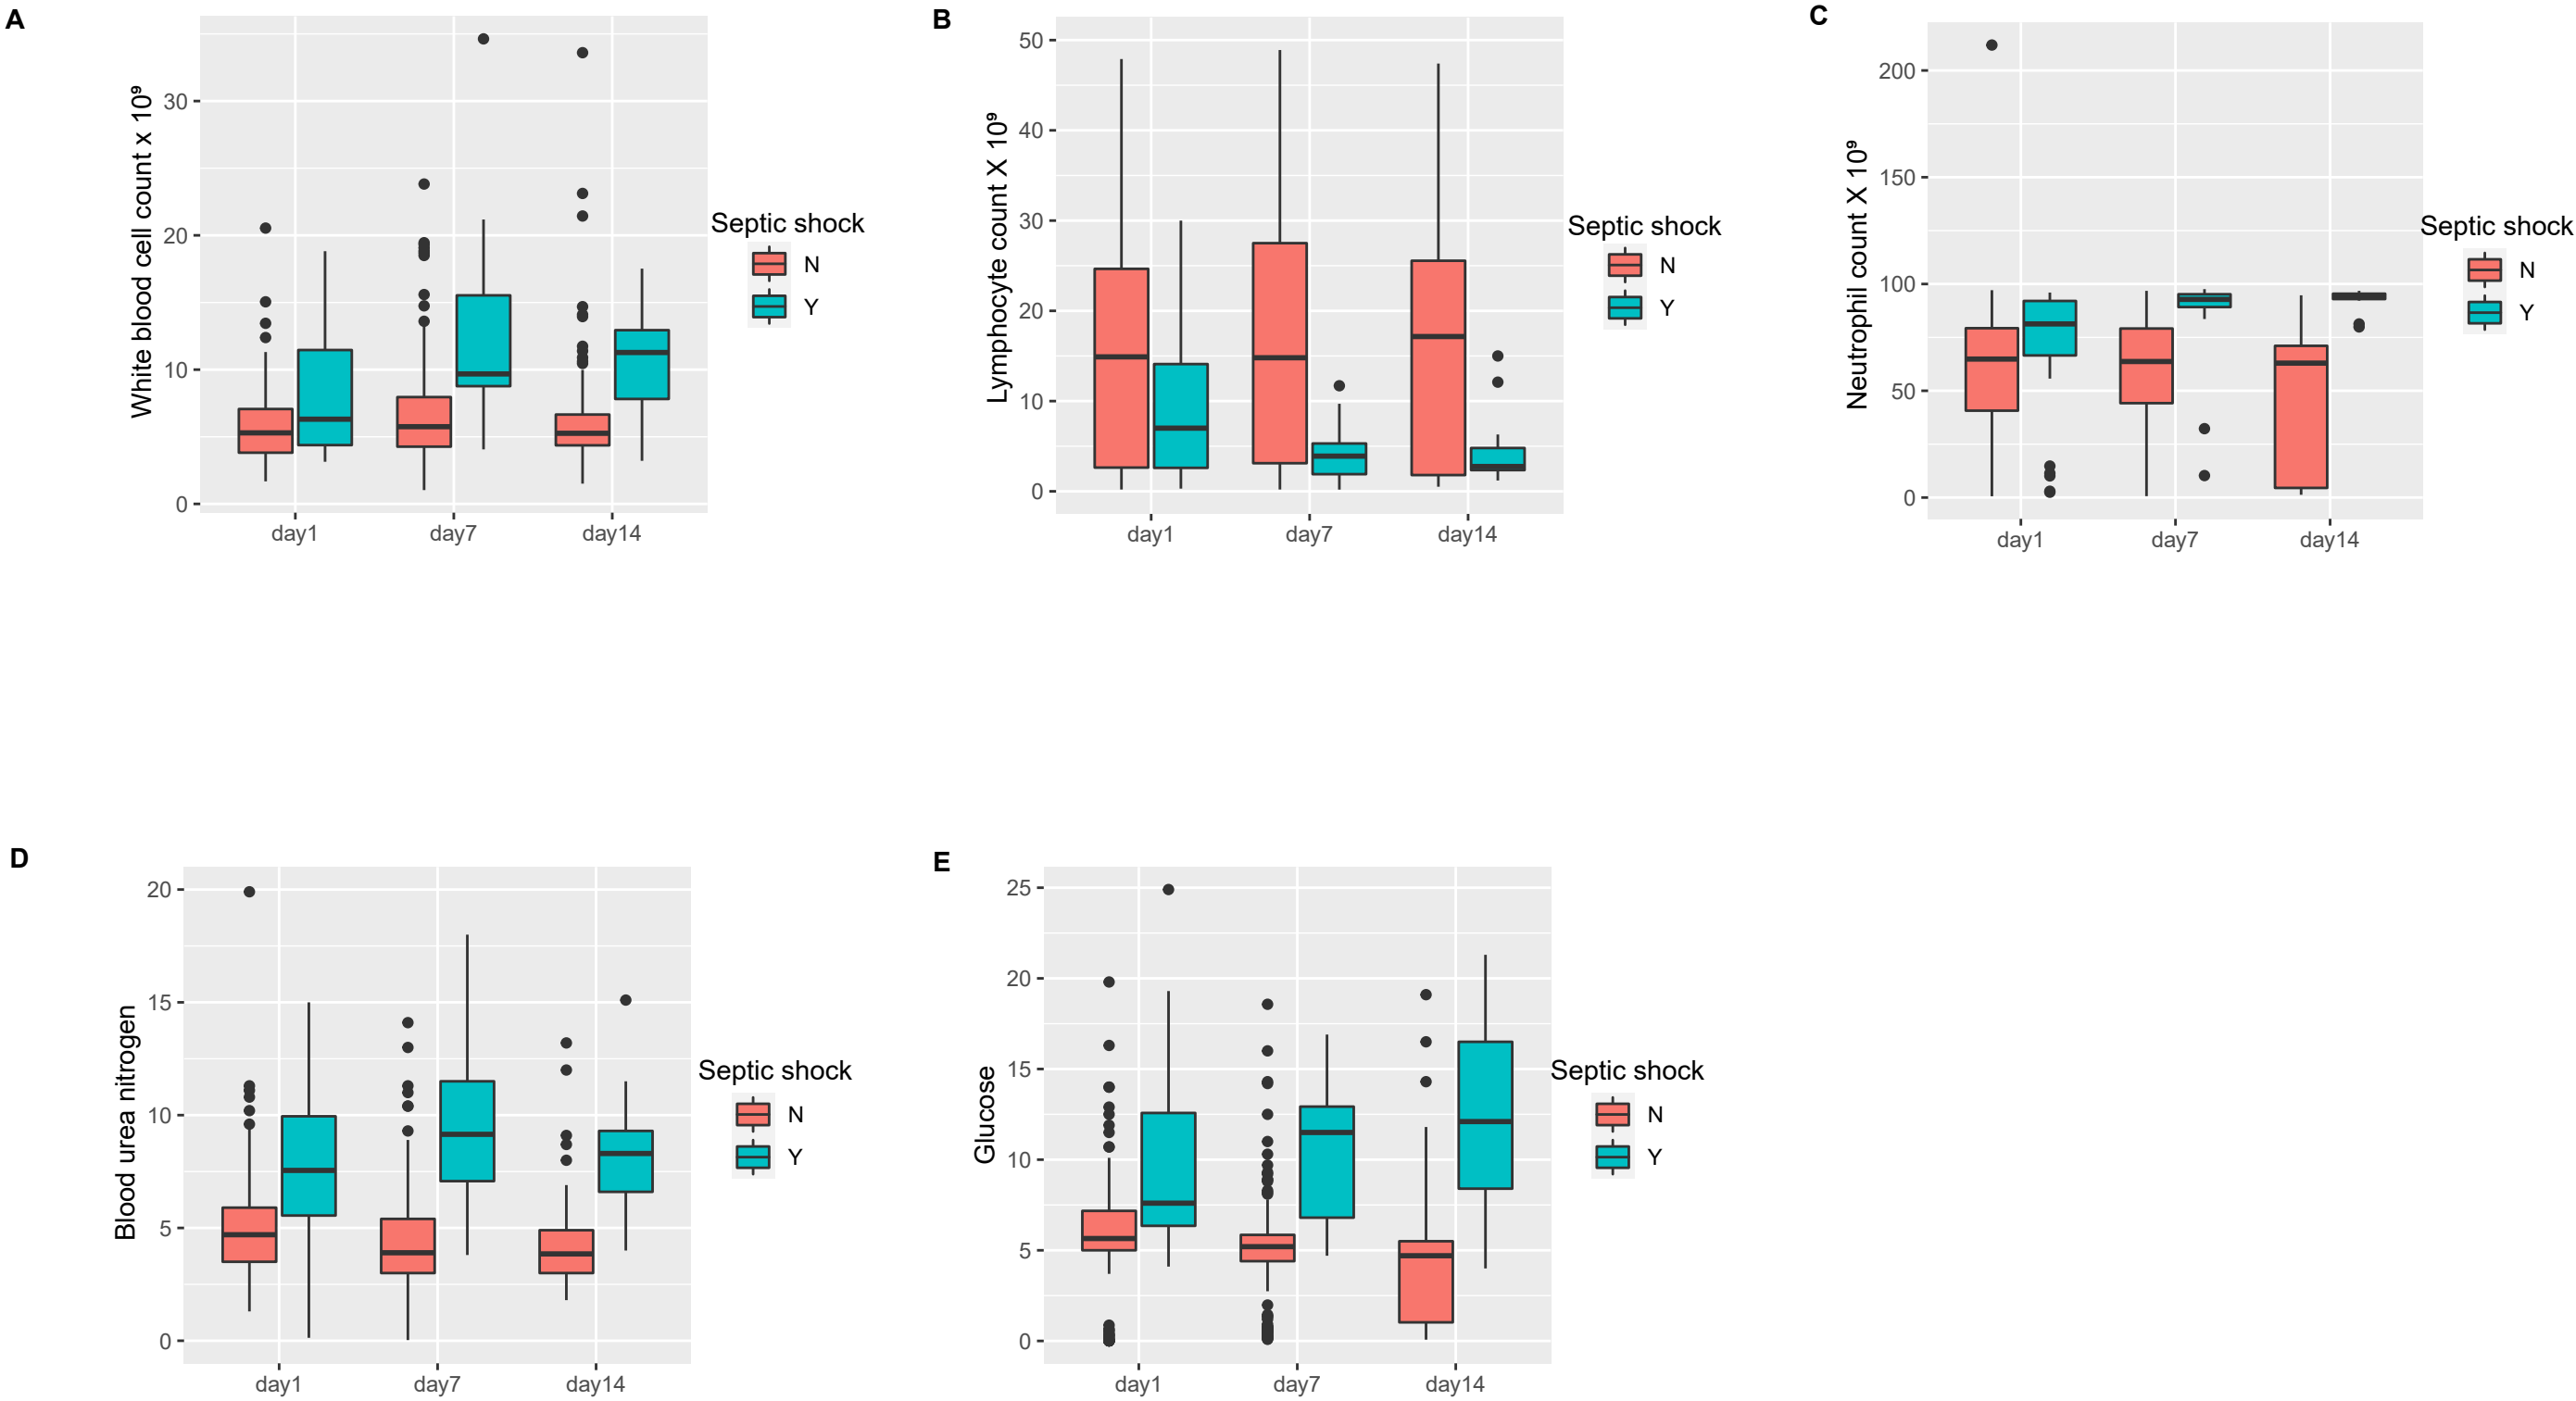

**Supplementary Figure S3 Dynamic Profile of Laboratory test.** Fourteen days dynamic laboratory test results of COVID-19 patients with septic shock after hospitalization. (A) White blood cell count, (C) Neutrophil count, (E) Blood urea nitrogen, and (F) Glucose was significantly increased in the septic shock group. (B) Lymphocyte count was significantly decreased.
